1 **Ultra-low coverage genome-wide association study - insights**  
2 **into gestational age using 17,844 embryo samples with**  
3 **preimplantation genetic testing**

4  
5 Shumin Li<sup>1,#</sup>, Bin Yan<sup>1,#</sup>, Thomas K.T. Li<sup>6,#</sup>, Jianliang Lu<sup>1</sup>, Yifan Gu<sup>4,5</sup>, Yueqiu Tan<sup>4,5</sup>,  
6 Fei Gong<sup>4,5</sup>, Tak-Wah Lam<sup>1</sup>, Pingyuan Xie<sup>2,3,\*</sup>, Yuexuan Wang<sup>1,7,\*</sup>, Ge Lin<sup>3,4,5,\*</sup>,  
7 Ruibang Luo<sup>1,\*</sup>

8  
9 <sup>1</sup> Department of Computer Science, The University of Hong Kong, Hong Kong,  
10 China

11 <sup>2</sup> Hunan Normal University School of Medicine, Changsha, 410013, Hunan, China

12 <sup>3</sup> National Engineering and Research Center of Human Stem Cell, Changsha, Hunan,  
13 China

14 <sup>4</sup> NHC Key Laboratory of Human Stem Cell and Reproductive Engineering, School of  
15 Basic Medical Science, Institute of Reproductive and Stem Cell Engineering, Central  
16 South University, Changsha 410008, Hunan, China

17 <sup>5</sup> Clinical Research Center for Reproduction and Genetics in Hunan Province,  
18 Reproductive and Genetic Hospital of CITIC-Xiangya, Changsha 410013, Hunan,  
19 China

20 <sup>6</sup> Department of Obstetrics & Gynecology, Queen Mary Hospital, The University of  
21 Hong Kong, Hong Kong, China

22 <sup>7</sup> College of Computer Science and Technology, Zhejiang University, Hangzhou,  
23 China

24  
25 # These authors contributed equally to this work

26 \* To whom correspondence should be addressed: Ruibang Luo, Email:

27 [rbluo@cs.hku.hk](mailto:rbluo@cs.hku.hk), Ge Lin, Email: [linggf@hotmail.com](mailto:linggf@hotmail.com), Yuexuan Wang, Email:

28 [amywang@hku.hk](mailto:amywang@hku.hk), Pingyuan Xie, Email: [plainxie192@126.com](mailto:plainxie192@126.com)

29

30

31

32

33

34

35

36

37

38

39

40

NOTE: This preprint reports new research that has not been certified by peer review and should not be used to guide clinical practice.

41 **Abstract**

42 **Background:** Very low coverage (0.1 to 1x) whole genome sequencing (WGS) has  
43 become a promising and affordable approach to discover genomic variants of human  
44 populations for Genome-Wide Association Study (GWAS). To support genetic  
45 screening using Preimplantation Genetic Testing (PGT) in a large population, the  
46 sequencing coverage goes below 0.1x to an ultra-low level. However, its feasibility and  
47 effectiveness for GWAS remains undetermined.

48 **Methods:** We devised a pipeline to process ultra-low coverage WGS data and  
49 benchmarked the accuracy of genotype imputation at the combination of different  
50 coverages below 0.1x and sample sizes from 2,000 to 16,000, using 17,844 embryo  
51 PGT with approximately 0.04x average coverage and the standard Chinese sample  
52 HG005 with known genotypes. We then applied the imputed genotypes of 1,744  
53 transferred embryos who have gestational ages and complete follow-up records to  
54 GWAS.

55 **Results:** The accuracy of genotype imputation under ultra-low coverage can be  
56 improved by increasing the sample size and applying a set of filters. From 1,744 born  
57 embryos, we identified 11 genomic risk loci associated with gestational ages and 166  
58 genes mapped to these loci according to positional, expression quantitative trait locus  
59 and chromatin interaction strategies. Among these mapped genes, *CRHBP*, *ICAM1* and  
60 *OXTR* were more frequently reported as preterm birth related. By joint analysis of gene  
61 expression data from previous studies, we constructed interrelationships of mainly

62 *CRHBP, ICAM1, PLAGL1, DNMT1, CNTLN, DKK1* and *EGR2* with preterm birth,  
63 infant disease and breast cancer.

64 **Conclusions:** This study not only demonstrates that ultra-low coverage WGS could  
65 achieve relatively high accuracy of adequate genotype imputation and is capable of  
66 GWAS, but also provides insights into uncovering genetic associations of gestational  
67 age trait existed in the fetal embryo samples from Chinese or Eastern Asian populations.

68

69 **Keywords:** Ultra-low coverage Whole Genome Sequencing, Imputation, Single  
70 Nucleotide Polymorphisms, Genome-Wide Association Study, Gestational Age,  
71 Preterm Birth

72

73

74

75

76

77

78

79

80

81

82

83

84

85

86

87

88

89

90

91

92

93

94

95

## 96 **Background**

97 Detection and characterization of genetic variants associated with traits and diseases  
98 are fundamental to the study of human genetics. Genome-Wide Association Study  
99 (GWAS) is an approach widely used in genetic research that aims to decode the  
100 associations of specific genetic variations with particular diseases or traits in sample  
101 populations. In the past decade, GWAS has facilitated discovery of over one hundred  
102 thousand variants associated with complex traits in human (1). Whole-genome  
103 sequencing (WGS) has emerged as a dominant technology in GWAS because it enables  
104 one to generate a comprehensive view of the genomic variation landscape for not only  
105 a specific trait but also for common diseases. Thus, WGS-based approaches hold a  
106 significant advantage over genome-wide genotyping arrays or exome sequencing in the  
107 analysis of complete genetic variations. However, with a fixed budget, the high cost of  
108 sequencing many DNA samples is a limitation for GWAS (2-4). Recently, to reduce the  
109 cost of sequencing, a number of low (0.5-1x) or extremely low-coverage (0.1-0.5x)  
110 WGS has been carried out as an alternative method of genotyping (2, 5, 6). It is,  
111 however, unclear whether ultra-low coverage WGS (ulcWGS) below 0.1x data can  
112 capture enriched genetic variations across the entire allele frequency (AF) spectrum.  
113 When considering a balance between number of samples sequenced and sequencing  
114 read coverage, effective genotype imputation could provide more authentic DNA  
115 variants that would be helpful for genetic research.

116 Genotype imputation can be used to infer missing genotypes and to increase the  
117 accuracy of detecting genetic variants, such as single nucleotide polymorphisms (SNPs).

118 In general, performance of genotype imputation is largely affected by sample size,  
119 sequencing coverage, analysis methods, and other parameters (7). A main challenge to  
120 use very low coverage WGS is how to achieve an adequately accurate imputation for  
121 downstream analyses. Previous attempts have shown the efficiency of low coverage  
122 WGS, for example, a high  $r^2$  of imputation accuracy observed by using 10 low coverage  
123 WGS ( $\sim 0.5x$ ) as compared to known genotypes (6). Pasaniuc et al. reported that the  
124 GWAS signals obtained from using 909 whole-exome sequencing ( $\sim 0.24x$ ) are  
125 comparable to using genotyping array (2). Gilly et al. found that more true association  
126 signals were identified by WGS ( $\sim 1.0x$ ) than the traditional array-based study (5).  
127 Using ulcWGS (0.06x-0.1x) with 141,431 samples from a Chinese genomic study, the  
128 accuracy of imputed genotypes reached 0.71 (8). Even though the distribution of  
129 genetic background from large number of samples is expected to compensate for the  
130 low sequencing coverages, it has never been determined how many samples are needed  
131 to achieve a relatively high accuracy. More importantly, lack of comparative data with  
132 coverages less than 0.05x results in the limited application of ulcWGS to GWAS.

133 Gestational age is an important complex trait associated with biological processes  
134 and human disease. Biologically, gestational duration plays a vital role in both mental  
135 and physical health of children at an age of five-year-old (9). Gestational age shorter  
136 than 37 weeks is categorized as Preterm Birth (PTB). Previous studies found the  
137 contribution of both the maternal and fetal genomes to variation of gestational ages (10-  
138 12). However, they focused on European and African samples by involving few  
139 samples from Chinese or Eastern Asian ancestries. Overall, biological mechanisms

140 underlying variation of gestational durations remain unclear, primarily because  
141 insufficient maternal or fetal genotypes with widespread gestational ages have been  
142 collected (13). Recently, Preimplantation Genetic Testing (PGT) with trophoctoderm  
143 biopsy for embryo aneuploidy screening has become a common practice in *in vitro*  
144 fertilization (14, 15), and poses as an expectant source of genotypes for GWAS.  
145 However, if the average sequencing coverage of PGT is even lower than the lowest  
146 levels that have been reported in GWAS so far, it is necessary to examine whether such  
147 PGT datasets are appropriately applied to GWAS.

148 In this study, we devised a pipeline for analyzing and applying the ulcWGS of  
149 17,844 embryo samples for GWAS. Our result shows that a large sample size is  
150 effective to increase the accuracy of genotype imputation even at an ultra-low coverage.  
151 Furthermore, using the imputed genotypes of 1,744 embryos that were successfully  
152 transferred and born with a widespread of gestational ages, we demonstrate the power  
153 of using ulcWGS in GWAS and provides insights into understanding genetic  
154 association of gestational age in embryos acquired from Chinese and East Asians.  
155 Refreshing the lowest coverage used in GWAS, our finding also provides a foundation  
156 for exploring the utilization of an even lower coverage for dissecting genotype-  
157 phenotype associations.

158

## 159 **Methods**

### 160 **Samples and sequencing coverage**

161 The whole PGT dataset of 17,844 embryos was from the Clinical Research Center for  
162 Reproduction and Genetics in Hunan Province, Reproductive and Genetic Hospital of

163 China International Trust Investment Corporation - Xiangya. The protocol of embryo  
164 culture and biopsy was published in a related study (16). Three WGA kits were applied  
165 to the biopsied TE cells by following the manufactures' guides, including REPLI-g  
166 Mini Kit (called MDA), WGA4 GenomePlex Single Cell Whole Genome  
167 Amplification Kit (called dop-PCR) and Rubicon Genomics PicoPlex Single Cell  
168 Whole Genome Amplification Kit (called PicoPlex). A 1-2  $\mu$ g of the WGA product was  
169 subjected to library construction and sequencing on the four platforms, including BGI-  
170 Seq 500, Illumina MiSeq, Ion Proton, Ion Torrent (Additional file 1: Table S2).

171

## 172 **Study design**

173 We developed a three-step pipeline to carry out genotype imputation using ulcWGS  
174 data and to perform GWAS of the detected SNPs (Fig. 1). Firstly, the raw reads of the  
175 17,844 embryo samples were aligned to the hs37d5 reference genome. Sequencing  
176 coverage of these embryo samples displays a distribution with an average coverage  
177 0.04x (Additional file 3: Figure S1). To our best knowledge, it is below the coverage of  
178 any dataset used previously for genotype imputation. After removing potential PCR  
179 duplicates, the aligned reads were used to call population SNPs. Secondly, we  
180 conducted genotype imputation on each individual sample at the called population  
181 SNPs and assessed the genotyping accuracy based on the standard Chinese sample  
182 HG005 with known genotypes from GIAB (Genome in a Bottle, NIST)(17). Last, we  
183 applied the imputed genotypes from 1,744 born embryos with complete follow-up

184 records to GWAS and explored biological associations between the genetic variants  
185 detected in the born embryos and their gestational ages.

186

### 187 **Sequencing read processing and alignment**

188 In the first step of Fig. 1, the raw reads of the PGT samples were delivered in two  
189 types, fastq or BAM. For BAM data, we used bedtools (18) to extract the raw reads into  
190 single-end fastq files. The raw reads of each sample were then aligned to the hs37d5  
191 reference genome using BWA (19). BWA-mem was applied to samples sequenced by  
192 the Ion Torrent with longer reads and “bwa aln” was used for the rest of the samples  
193 with shorter reads. Samtools rmdup (20) was used to remove the potential PCR  
194 duplicates.

195

### 196 **Population SNP calling**

197 In the population SNP calling stage, we modified the method of Liu et al. (8). The first  
198 stage is to use log-likelihood estimation for AF estimation, and the second stage is to  
199 use log-likelihood ratio test for determining allelic types. More details are described in  
200 Additional file 2: Supplementary Methods.

201 SNP calls of the raw population were filtered following the rules, 1) calls that  
202 overlapped with the 35-kmer problematic alignment regions in hs37d5 were removed  
203 (21); 2) calls that overlapped with regions with ENCODE mappability uniqueness  
204 score unequal to 1 were removed (22), tool “bigWigToBedGraph” used afterward to  
205 convert the bigwig into bed format) (23).

206



## 207 **Genotype imputation**

208 We used STITCH (24) version 1.5.7 for genotype imputation. The ancestral haplotypes  
209 number  $k$  was set as 20, the assumed number of generations  $nGen$  was set to 2000, and  
210 the reads were binned into windows with *gridWindowSize* 10000. The *diploid* mode in  
211 STITCH was used. Although using a reference panel is optional in STITCH, we used  
212 the IMPUTE2 1000 genome haplotypes phase 1 reference panel as it improves the  
213 accuracy of imputation when the sample size is small. With sample size larger than  
214 10,000, the improvement was not significant. All parameters were optimized by  
215 maximizing the  $r^2$  of the estimated AFs between imputation and population SNP  
216 calling in a randomly chosen 5 Mbp genomic region (chr3:180-185Mbp). When  
217 applying STITCH to the whole genome, we divided the genome into 5 Mbp windows  
218 with a 500 Kbp overlap between two windows.

219 For benchmarking, seqtk was used to subsample the HG005 Illumina WGS raw  
220 reads to 0.01x-0.1x (Paired-end 250bp, 300-fold). We aligned the reads to hs37d5 by  
221 using the same pipeline as used in the embryo samples. Because a computer takes a few  
222 years to impute whole genome with tens of thousands of samples, we worked on only  
223 chromosome 1, the longest one in human. The genotype imputation was benchmarked  
224 according to 80 combinations of the 10-scale coverages of HG005 with 8 sizes of our  
225 samples from 2,000 to 16,000, respectively.

226 All bi-allelic SNPs with  $MAF \geq 0.01$  found in chromosome 1 with the population  
227 SNP calling from the 17,844 samples are included for genotype imputation. We used  
228 the 167,814 SNPs both in our SNP callset and HG005 known genotypes for

229 benchmarking. The imputed genotypes were compared to the truth released by GIAB  
230 for estimating the imputation accuracy. Then, genotype imputation was applied to all  
231 17,844 embryo datasets at the 31,622,332 bi-allelic sites with  $MAF \geq 0.01$  found in  
232 population SNP calling. The entire imputation process spent 19 days and used 15  
233 machines with 16 cores (two 8-core Intel Xeon Silver 4108 CPU). Two filters “INFO  
234 score  $\geq 0.4$  and HWE  $p$ -value  $> 1e-6$ ” were applied to select the imputed genotypes.

235

### 236 **Genome-wide association study (GWAS)**

237 To conduct GWAS, we used score statistics (25) that is implemented in ANGSD (26).  
238 Variants satisfying four conditions were selected as inputs, including 1) known in  
239 dbSNP150, 2)  $MAF \geq 0.01$ , 3) INFO score  $\geq 0.4$ , and 4) HWE  $p$ -value  $> 1e-6$ . To  
240 remove biases, we specified 16 covariates for ANGSD, 8 most significant principal  
241 components calculated from the inputs of PCA (Additional file 2: Supplementary  
242 Methods), and 8 clinical records including maternal age, maternal BMI, fetal sex, either  
243 parent with single-gene disease, either parent with chromosome abnormality, multiple  
244 pregnancy, preeclampsia and gestational diabetes of mellitus. Except the default  
245 parameters, we set *minHigh* to 15 (requiring at least 15 high credible genotypes from  
246 the input) instead of 10 to achieve better accuracy with a large sample size. ANGSD  
247 did not create an output beta-coefficient, so we followed the ideas of Skotte et al. (25)  
248 by incorporating the genotype probabilities and all 16 covariates into a linear regression  
249 model, with the gestational age as a response variable. The effect size was calculated  
250 by the coefficient of genotypes.

## 251 **Independent SNPs and genomic risk loci**

252 The significant SNPs from our GWAS were mapped to genomic risk loci using FUMA  
253 pipeline (27) and the LD information of 1000G EAS variants (28). We first defined  
254 “independent significant SNP”, a SNP that meets genome-wide significance level  
255 ( $p \text{ value} \leq 4.515e - 8$ ) and is independent of other significant SNPs (with LD  $r^2 <$   
256  $0.6$ ). FUMA also generated a set of lead SNPs with low LD and with other ( $r^2 < 0.1$ )  
257 from the independent significant SNPs. The genomic risk loci were identified by  
258 starting from these lead SNPs and through iteratively merging related genomic regions  
259 to them according to FUMA’s rules.

260 Also, the FUMA pipeline sorted out a set of candidate SNPs from our inputs  
261 that meets one of two conditions, 1) the independent significant SNPs and 2) SNPs that  
262 are linked to the independent significant SNPs (with LD  $r^2 \geq 0.6$ ). For condition 2,  
263 the SNPs can be from our imputed genotypes if  $p$  value below 0.05 or from the reference  
264 panel of 1000G EAS. ANNOVAR was used to annotate the candidate SNPs (29).

265

## 266 **Functional annotation of the mapped genes**

267 DAVID online tool (30) was used to analyze the enrichment of Gene Ontology (GO)  
268 biological processes and KEGG pathways for the coding genes mapped to the risk  
269 loci.

270

## 271 **Gene mapping**

272 We used three gene-mapping strategies provided by FUMA (27), including positional,  
273 expression quantitative trait locus (eQTL) and chromatin interaction. For positional

274 mapping, ANNOVAR annotations were used. The candidate SNPs were mapped to the  
275 nearest genes within a maximum 10 Kbp distance. For eQTL mapping, expression data  
276 of all tissue types in GTEv6, GTEv7, and GTEv8 (31) were used. We required False  
277 Discovery Rate (FDR)  $< 0.05$  and p value  $< 0.001$  for a valid eQTL mapping. All  
278 chromatin interaction data in FUMA were used (32-35). The promoter was set to  
279 upstream 2000 bp to downstream 500 bp of transcriptional starting sites. We required  
280 FDR  $< 1e-6$  for a valid chromatin interaction mapping.

281

## 282 **Analysis of genome-wide mRNA expression data**

283 We first extracted the genome-wide microarray and RNA-seq data of human mRNA  
284 expression from GEO/NCBI database. The mRNA data includes three subsets in  
285 maternal PTB, infant PTB and breast cancer (Additional file 1: Table S8). Based on the  
286 normalized expression data provided by the database, we analyzed differentially  
287 expressed genes (DEGs) between different conditions, including 1) PTB vs. normal  
288 term, 2) BPD or sepsis vs. infant without BPD or sepsis, and 3) breast cancer vs. control  
289 samples. For microarray platform-based data, we used the *limma* package in R  
290 programming language and conducted empirical Bayes moderated t-test. DEGs were  
291 detected with a fold change above 1.5 and p value below 0.05. For RNA-seq data with  
292 raw counts, we utilized the Edge-R method to identify DEGs. The DEGs are listed in  
293 Additional file 1: Table S9.

294

## 295 **Results**

### 296 **Benchmarking genotype imputation using the ultra-low coverage** 297 **sequencing data of 17,844 embryos and HG005**

298 We estimated the accuracy of the imputed genotypes from the SNPs of chromosome 1  
299 both called in our 17,844 samples and the known genotypes in HG005. The genotype  
300 imputation was benchmarked according to 80 combinations of the 10-scale coverages  
301 of HG005 with 8 sizes of our samples. A monotonic increase in accuracy with  
302 sequencing coverage was observed (Fig. 2a), consistent with previous studies (2, 24).  
303 The accuracy for sample size of 2,000 stayed at around 0.48 under all sequencing  
304 coverages. But for a larger sample size of 16,000, its accuracy increased from 0.48 at  
305 0.01x to 0.66 at 0.1x. This result suggests that at ultra-low coverages, increase in sample  
306 size could obtain higher accuracy (Additional file 1: Table S1). In general, a lower  
307 coverage with a larger sample size results in better performance than a higher coverage  
308 with a smaller sample size. For example, the genotype accuracy at 0.05x with 14,000  
309 samples versus 0.1x with 4,000 embryos was 0.61 versus 0.55. A larger sample number  
310 is therefore more efficient in optimizing genotype imputation than increasing sequence  
311 coverage. It is also noticed that at the two lowest coverages in our experiments, the  
312 contribution of increasing sample size was not significant and the accuracy plateaued  
313 at 0.52 (0.01x) and 0.55 (0.02x). Using the same datasets, we evaluated allele accuracy  
314 that relaxed zygosity correctness from genotype accuracy. The corresponding  
315 accuracies were much better (increased to 0.7 and higher) while maintaining the same  
316 trend with increasing sample size and coverage (Fig. 2b). Therefore, when the

317 genotypes are incorrectly imputed for some SNPs, the non-reference allele could be  
318 correctly detected.

319 We next examined several important quality metrics that are widely used to filter  
320 falsely imputed genotypes. The INFO score of IMPUTE2 style (36) denotes the  
321 certainty of an imputed genotype and has been accepted as a quality metric of  
322 imputation. For a combination of 0.04x coverage with 16,000 samples, we  
323 benchmarked ten different INFO score thresholds from 0.1 to 1.0 and detected  
324 corresponding SNPs. As increase in the INFO scores, we observed a consistent increase  
325 in genotype accuracy from ~0.60 to 0.99, but a rapid decrease in number of SNPs that  
326 meet these thresholds (Fig. 3a). Thus, INFO score could act as an effective metric to  
327 evaluate the accuracies at ultra-low coverage, but its thresholds should be meticulously  
328 chosen in order to retain sufficient SNPs. Effect of MAF scores on genotype accuracy  
329 of HG005 were then tested as a potential metric. We divided the genotyping results at  
330 different sequencing coverages (sample size fixed to 16,000) into bins of MAF ranges  
331 (0.01 MAF a bin) and calculated the genotype accuracy each bin. The genotype  
332 accuracy increased rapidly from MAF 0 to 0.05 and reached a turning point at 0.05.  
333 After this point, the accuracy became slow increasing (Fig. 3b). However, even for the  
334 most common SNPs (MAF 0.4~0.5), the accuracy was converged at ~70%. The  
335 accuracy of the two lowest coverages 0.01x and 0.02x fluctuated especially at low MAF  
336 cutoffs. Because such fluctuation was not observed during INFO testing, MAF might  
337 not be a reliable metric to change genotype accuracy at ultra-low coverage. In  
338 subsequent analyses, we followed the common practice to use SNPs with  $MAF \geq 0.01$

339 for GWAS. Finally, we combined HWE  $p$ -values with INFO scores as a filter but  
340 without losing too many SNPs. HWE  $p$ -values could evaluate the probability of the  
341 imputed genotype at a certain SNP that is significantly different from the expectations  
342 by Hardy-Weinberg Equilibrium. We summarized the genotype accuracy of different  
343 combinations of INFO scores and HWE  $p$ -value cutoffs in Table 1. When INFO scores  
344 were set above 0.4, the accuracies of genotype and allele were 70.0% and 83.4%,  
345 respectively, with 48,176 SNPs left. The “INFO score  $\geq 0.4$  and HWE  $p$ -value  $>1e-6$ ”  
346 resulted in an increased accuracy 71.5%, with 28773 SNPs left. Thus, our GWAS  
347 utilized this setting, “INFO score  $\geq 0.4$  and HWE  $p$ -value  $>1e-6$ ” as filtering criteria.

348 To summarize our benchmarking results for future study on ulcWGS, we built a  
349 regression model (Formula 1) to calculate the expected genotype accuracy using  
350 sequencing coverage and sample size as inputs.

$$acc = 2.227 * c + 8.937e^{-6} * s + 0.494 \quad (c \geq 0.01, s \geq 4000) \quad (1)$$

351 where  $acc$  is the expected genotype accuracy,  $c$  denotes the sequencing coverage,  $s$   
352 denotes the sample size. The model has a  $r^2$  of 0.874 (Additional file 3: Figure S2).

353

### 354 **GWAS of gestational ages using 1,744 born embryos**

355 With the solid foundation laid out in the previous section, we have obtained sufficient  
356 good quality SNPs for GWAS. Among the 17,844 sequenced embryos, 1,744 were  
357 transferred and gave birth to a baby. The gestational age of all 1,744 born embryos are  
358 well documented and thus were chosen for biological associated study. We revised the  
359 population SNP calling method used in Liu et al. (8). A total of 151,793,444 SNPs were  
360 detected and of 141,718,305 are bi-allelic. The MAF spectrum bi-allelic novel and

361 known variants in dbSNPv150 (37), 1000G (28) and gnomAD (38) is shown in  
362 Additional file 3: Figure S3a. The transitions/transversions ratio for “all bi-allelic SNPs”  
363 and “bi-allelic SNPs known in dbSNPv150” were 3.05 and 3.58, respectively. Pearson  
364 correlation coefficient of the non-reference AFs between the 301 Chinese samples in  
365 1000G (so-called 1000G CHN (28)) and the corresponding SNPs obtained in our  
366 dataset was 0.986 (Additional file 3: Figure S3b). This result supports a strong  
367 correlation between the two datasets, and high confidence of the known variants used  
368 in our analysis. We also performed genotype imputation at bi-allelic population SNPs  
369 with  $MAF \geq 0.01$ . Pearson correlation coefficient was 0.985, showing a high  
370 consistency between the estimated AFs in population SNP calling and in imputation.

371 Three different whole genome amplification (WGA) methods and four different  
372 sequencing platforms were used in the PGT dataset (Additional file 1: Table S2). It is  
373 not uncommon that large number of samples may use multiple sequencing platforms  
374 and WGA. Removing these unrelated covariates from GWAS as much as possible is  
375 essential especially when the sequencing coverage is ultra-low. Such covariates should  
376 be detected and disregarded in GWAS. We applied Principal Component Analysis (PCA)  
377 to the imputed genotypes of SNPs with  $MAF \geq 0.05$  among all 17,844 embryo samples  
378 (Additional file 2: Supplementary Methods, Additional file 3: Figure S4a). The first and  
379 second principal components distinguish the differences of sequencing platforms  
380 (Additional file 3: Figure S4b) and of WGA methods (Additional file 3: Figure S4c).  
381 Therefore, we used the top eight principal components and eight other clinical records  
382 as covariates in GWAS. PCA was also applied to the GWAS samples and the top



383 principal components were included in the subsequent analyses as covariates for  
384 removing the biases.

385 We used the state-of-the-art one-stage GWAS strategy (39) to analyze the  
386 1,107,198 imputed SNPs in the 1,744 transferred and born embryo samples with  
387 complete follow-up records. The distribution of gestational ages shown in Additional  
388 file 3: Figure S5 include 162 preterm deliveries (gestational age < 37 weeks), 42 early  
389 preterm deliveries (gestational age <34 weeks), and 8 very early preterm deliveries  
390 (gestational age <28 weeks). The gestational ages were standardized by z-score and  
391 incorporated as a quantitative trait.

392 A total 1,107, 198 SNPs with imputed genotypes were selected for GWAS that  
393 are in accord with, 1)  $MAF \geq 0.01$ , 2) known in dbSNPv150, and 3) passed the filter  
394 “INFO score  $\geq 0.4$  and HWE  $p$ -value  $> 1e-6$ ”. The Q-Q plot shows a large deviation of  
395 the observed  $p$  values from the null hypothesis (Additional file 3: Figure S6). The  
396 linkage disequilibrium score regression (LDSC) software package (40) with 1000G  
397 EAS reference was used to estimate  $\lambda_{GC} = 0.992$ , mean  $\chi^2 = 1.012$ . The LD score  
398 regression intercept was 0.952, standard error = 0.021, indicating that the population  
399 stratification and other factors were well-controlled. We identified 40 significant SNPs  
400 satisfying Bonferroni-corrected significant levels of  $4.515e-8$ . The Manhattan plot  
401 shows the distribution of the detected SNPs cross all chromosomes (Fig. 4a, Additional  
402 file 1: Table S3).

403 We used FUMA (27) pipeline for GWAS downstream analysis. First, FUMA  
404 generated a set of candidate SNPs and the 11 independent SNPs (Additional file 1:

405 Table S4). By annotation, most of the SNPs are located and enriched in intergenic and  
406 intronic regions (Fig. 4b), which is similar to the previous study (41). Specifically, there  
407 are 11 SNPs located in exons (0.8% of total), and 4 of them are non-synonymous SNPs  
408 (Additional file 1: Table S5). Additionally, we observed the distribution of regulatory  
409 elements and chromatin states with the candidate SNPs (Additional file 3: Figure S7).  
410 According to RegulomeDB scores assigned to each candidate SNP, 1.09% SNPs were  
411 classified as likely to affect regulator binding (score 2a and 2b) and 0.21% as likely to  
412 affect regulator binding and linked to expression of a gene target (score 1d and 1f).  
413 These proportions of SNPs hold a relatively high likelihood to affect the regulatory  
414 elements along noncoding regions. Second, we identified 11 leading SNPs from their  
415 corresponding genomic risk loci by FUMA. Fig. 4e shows the DNA length, number of  
416 SNPs and mapped genes of these risk loci. The zoom in locus plot of the 11 risk loci  
417 are shown in Additional file 3: Figure S8. Of 4 risk loci were reported to be associated  
418 with refractive astigmatism, adolescent idiopathic scoliosis, glomerular filtration rate,  
419 among others, indicating a possible connection of these diseases or traits with PTB  
420 (Additional file 1: Table S6).

421 By integrating strategies positional, eQTL and chromatin interaction mappings,  
422 we identified a total of 166 genes mapped to the 11 risk loci, including 48 and 19 genes  
423 from two and three strategies, respectively (Fig. 4c, Additional file 1: Table S7). There  
424 were 24 genes detected within or less than 10 Kbp from the candidate SNPs and 7 of  
425 them were shown in Fig. 4a based on the location of the genomic risk loci. Importantly,  
426 *CNTLN* was reported as a PTB related gene (42), and *PINI* involves inhibition of breast

427 cancer (43). A Circos plot shows the graphic distribution of the mapped genes via eQTL  
428 and chromatin interaction, and their links with the genomic risk loci (Fig. 4d). The  
429 breakdown of each chromosome is shown in Additional file 3: Figure S9. Even though  
430 not within any risk loci, *CRHBP* was linked through chromatin interaction mapping to  
431 two loci, chr5:75101342-75164623 and chr5:78251511-78271282. Enrichment  
432 analysis of DEGs in 30 tissue types in GTEx v8 (44) exhibits significant overexpression  
433 of the mapped genes in both ovary and uterus (Additional file 3: Figure S10a). The  
434 gene-set enrichment analysis also indicates their association with the immune system,  
435 breast cancer and transcriptional regulation (Additional file 3: Figure S10b).

436

#### 437 **Association of the 166 mapped genes from GWAS with preterm birth,** 438 **infant disease and breast cancer**

439 GWAS of gestational age related PTB has been implicated in biological functions that  
440 include immune response, inflammatory response, and coagulation factors (11, 45-47).  
441 We compared our 166 mapped genes with reported PTB markers by collection of 8  
442 published resources, here classed to 3 PTB sets, including dbPTB from Sheikh et al.  
443 (48) and Uzun et al (49), PTB-merged from 5 data resources (10), and PNAS-identified  
444 DEGs of PTB in 2019 (10). We found that *CRHBP*, *EMRI*, *ICAMI*, *MBL2*, *OXTR*, and  
445 *THBS4* have been reported in at least 2 PTB sets. Specifically, *ICAMI* was present in  
446 all 3 sets and 6 data resources, and both *CRHBP* and *OXTR* in 5 resources (Additional  
447 file 1: Table S7). In addition, there were 8 genes overlapped with 1 PTB set (Fig. 5a).  
448 This result pinpoints a relationship of the detected risk loci with PTB, and possible roles  
449 of the overlapped genes in PTB. There are totally 1,930 genes reported as PTB-related;

450 however, only 50 were frequently recognized by at least 5 data resources, hereafter  
451 referred to as PTB marker genes (Additional file 1: Table S7). The 50-PTB marker set  
452 was significantly enriched with inflammatory and immune response related processes  
453 or pathways (Fig. 5b). Similarly, those PTB genes that overlapped with 3 or 4 resources  
454 mainly participate in the same biological functions. The PTB-related genes listed at Fig.  
455 5a involve immune response (*EMRI*, *ICAMI*, *PTPRZI* and *MBL2*), inflammatory  
456 response (*CRHBP*, *ICAMI*, *PTPRZI* and *MBL2*), coagulation (*MBL2*), apoptosis  
457 (*PLAGL1*) and cell adhesion (*ICAMI* and *THBS4*), emphasizing their associations with  
458 PTB.

459 To determine the relationship between the mapped genes and PTB, we first  
460 analyzed the DEGs between maternal PTB and normal term birth based on six  
461 published datasets of genome-wide gene expression (Additional file 1: Tables S8 and  
462 S9). Significant overexpression of *CRHBP* and *OXR* were identified in two datasets,  
463 while overexpressed (*ICAMI*, *EGR2*, and *PLAGL1*) and underexpressed (*THBS4*)  
464 genes were present in one dataset (Table 2). Another *DKK1* expressed higher levels  
465 above 2.0-fold in two datasets, suggesting its importance in PTB. Then, we analyzed  
466 four infant PTB datasets of gene expression, and found differentially increased  
467 expression of *ICAMI*, *CRHBP*, *DKK1*, *EGR2*, and *PLAGL1*, consistent with maternal  
468 PTB. In contrast, significantly underexpression of *THBS4*, *PINI* and *GCNT4* was  
469 commonly detected by maternal and infant subgroups (Table 2). It is also noticed that  
470 *DNMT1* shows increased expression in both fetal and maternal groups (Table 2). DNA  
471 methylation was suggested to involve generation of early PTB (10); however, the role

472 of *DNMT1* as a DNA methyltransferase in PTB has not been determined yet. This  
473 analysis provides evidence that these mapped DEGs above including *DNMT1* are  
474 associated with both maternal and infant PTB. Relatively, *OXTR* seems to be related to  
475 only maternal factor. A heatmap of mRNA expression shows clustering of 6 expression  
476 profile cross PTB and normal term conditions (Fig. 5c). Two clusters display distinct  
477 expression patterns of these PTB genes.

478 It is well known that bronchopulmonary dysplasia (BPD) is the most common  
479 respiratory disorder among children born preterm (50, 51). The pathogenesis of BPD  
480 involves multiple prenatal and postnatal mechanisms affecting the development of  
481 immature lung. Also, neonatal sepsis is associated with severe morbidity and mortality  
482 during the neonatal stage. The incidence of late-onset sepsis increases with increase in  
483 survival rate of preterm and low weight babies (52). Thus, we examined the possible  
484 relationship of the 166 genes with infant BPD and sepsis by analyzing gene expression  
485 data derived from samples of preterm infants (Additional file 1: Table S8). We first  
486 identified differentially increased expression of *CRHBP*, *ICAMI* and *EGR2* under PTB  
487 of maternal & infant and BPD conditions, but differentially decreased expression of  
488 *DKK1* (Table 2). Under sepsis condition, differentially overexpressed *CNTLN*, *ICAMI*,  
489 and *PLAGL1* in PTB were consistently observed. By contrast, *GCNT4* expression was  
490 always significantly decreased under maternal and infant subpopulations. The gene  
491 clustering shows diversity of gene expression across different samples with infant PTB;  
492 however, these up-regulated genes were grouped together (Fig. 5d), supporting the idea  
493 that BPD or sepsis induces the change in these PTB genes.

494 Breast cancer is one of the most frequently diagnosed malignancies observed  
495 during pregnancy. It often presents characteristics of high malignancy and are hormone  
496 receptor negative like Estrogen receptor (ER)-, HER2+ or triple negative breast cancer  
497 (TNBC). We collected gene expression data mainly presenting three subtypes of breast  
498 cancer, TNBC, HER2+ and ER or Progesterone receptor (PR) (Additional file 1: Table  
499 S8). By analysis of DEGs, we detected the expression of PTB related genes *DKK1*,  
500 *ICAM1*, *DKK1*, *EGR2*, *PLAGL1*, *GCNT4* and *THBS4* in all three subtypes. Increased  
501 *ICAM1* and decreased *PLAGL1* were consistently identified in these datasets (Table 2).  
502 In fact, *ICAM1* has been reported as TNBC markers (53) and acts as prognostic  
503 molecule of breast cancer (54). Both *ICAM1* and *DKK1* could increase expression in  
504 TNBC cells (55). However, other PTB related genes do not display similar changes in  
505 expression under the cancer subtypes. For example, *OXTR* was detected by only one  
506 dataset of ER+/-, while *CRHBP*, *EMRI*, *PINI* and *MBL2* were not found among any of  
507 the subtypes. Conversely, underexpression of *PLAGL1* and *GCNT4* were found in all  
508 three types of breast cancer. In addition, overexpression of *DNMT1* was observed in  
509 TNBC and HER2+ subtypes, that validates its oncogenic roles in breast cancer and drug  
510 target of TNBC (56, 57).

511 To identify further interactions between the selected PTB genes from Table 2 and  
512 the top 50 PTB markers, we calculated Pearson correlation coefficient by comparing  
513 their gene expression of maternal and infant PTB, BPD and sepsis subsets, respectively.  
514 We built the corresponding co-expression networks of the PTB genes (Additional file  
515 3: Figure S11). Clearly, the co-expressed genes involve immune and inflammatory

516 responses, coagulation, as well as apoptosis, angiogenesis, among others. We then  
517 constructed the networks cross different subpopulations. As shown in Fig. 6a, the PTB  
518 genes could involve both maternal and infant PTB processes, especially *ICAMI*,  
519 *PLAGLI*, *EGR2* and *CRHBP* that link to TLR4, a known preterm marker associated  
520 with immune and inflammatory processes (58). Similarly, co-expression interactions of  
521 these genes with the top PTB markers were observed under maternal PTB and infant  
522 BPD (Fig. 6b). Both *OXTR* and *PINI* only display gene correlations under maternal  
523 PTB, whereas *MBL2* only correlates under infant PTB. This analysis indicates that the  
524 predicted PTB-related genes including *ICAMI*, *CRHBP*, *PLAGLI*, *EGR2*, *CNTLN*, and  
525 *DKKI*, play an important role in performing biological activities associated with PTB,  
526 infant disease, possibly breast cancer, due to the gestational age-induced.

527

## 528 **Discussion**

529 Low or very low coverage sequencing data have been increasingly used in discovery of  
530 genetic variation and GWAS. However, if the coverages are further decreased to  
531 extremely ultra-low levels, how many samples are required to obtain a relatively high  
532 accuracy of genotype, and whether these samples can be appropriately applied to  
533 GWAS. To address this challenge, we used 17,844 PGT datasets of embryo samples  
534 with an average of 0.04x coverage and achieved genotype imputation performance  
535 comparable to those using low coverage samples. We first demonstrate that increase in  
536 number of ulcWGS samples is more efficient than changing sequencing coverages and  
537 indicates the ability of such ultra-low coverage PGT samples to obtain adequate  
538 accuracy of phenotypes. Furthermore, we found that INFO score and HWE *p*-value are

539 effective to act as filters to improve the accuracy at ultra-low coverages while  
540 meanwhile keep enough SNPs for downstream analyses. To our best knowledge, the  
541 samples used in this study hold the lowest average WGS coverage for GWAS so far,  
542 and our study provides a framework for guiding other researchers who work on  
543 ulcWGS data.

544 Gestational age is a multi-factor phenotype involved in maternal and fetal  
545 biological activities (59). To investigate effects of the fetal genome on gestational age,  
546 we used the imputed genotypes of 1,744 born embryo samples, a cohort of samples who  
547 successfully gave birth after *in vitro* fertilization. From the 166 genes mapped to the 11  
548 genomic risk loci, we identified a set of the PTB-related genes that were previously  
549 reported (12, 59). *CRHBP*, *ICAMI*, and *OXTR* are primary representative genes  
550 showing evidence of genetic association with gestational age among our samples.  
551 *CRHBP* is an important gene in maternal and fetal gestation that could regulate the  
552 pregnancy length by increasing/decreasing the concentration of CRH (60, 61). *ICAMI*  
553 involves disease induced PTB during pregnancy (62-64). Oxytocin signaling is  
554 mediated by Oxytocin receptor (*OXTR*), which is related to gestational age (65). We  
555 validated these predicted PTB genes by analysis of DEGs from maternal and infant  
556 PTB subpopulations.

557 PTB is neonatal birth occurring before 37 weeks of gestation age and is a leading  
558 cause of infant morbidity and mortality. Understanding of genetic and molecular  
559 mechanisms of PTB and its association with gestation duration is currently insufficient.  
560 Recently, Zhang et al. reported replicable loci in six genes (*EBF1*, *EEFSEC*, *AGTR2*,



561 *WNT4*, *ADCY5* and *RAP2C*) associated with gestational duration (12). This study  
562 identified 3 genes (*EBF1*, *EEFSEC* and *AGTR2*) strongly associated with PTB in a  
563 European ancestry cohort of 43,568 women. However, we did not detect such 6 genes  
564 from the reported PTB markers and only identified them as DEGs from few published  
565 datasets of PTB. This could be due to the heterogeneous sources of samples used in  
566 different PTB studies or be explained in part by the genetic complexity of incomplete  
567 gestation induced PTB complications. Here, we collected almost 2,000 PTB-related  
568 genes from previous PTB studies. The differences in study design, source and subtype  
569 of samples, and statistical methods would be important factors that could account for  
570 the diversity of PTB variants and genes among the various studies. Considering the  
571 possible association of PTB with other traits, we compared differential gene programs  
572 on multiple phenotypes between mother and infant reported in previous studies, and  
573 demonstrated a high risk of *CRHBP*, *ICAMI*, *DNMT1*, *CNTLN*, *PLAGL1*, *DKK1* and  
574 *EGR2* with PTB among our sample cohorts of Chinese or Eastern Asian ancestry. To  
575 support this finding, we reconstructed co-expressive networks linking the PTB-related  
576 genes in GWAS with the reported PTB markers. Indeed, the correlated PTB genes are  
577 mainly involved in immune & inflammation related processes and signaling pathways,  
578 as well as coagulation factors. Thus, these findings have biological implications for  
579 dissecting genetic associations of gestational factors with disease or traits in different  
580 human ancestries.

581       Pregnancy is associated with an increased risk of developing breast cancer (66).  
582 Although several reports indirectly described relationship between breast cancer and

583 PTB (67), evidence is still lacking. To determine whether a correlation exists between  
584 PTB women and breast cancer pathogenesis, we compared differential expression of  
585 the PTB related genes in PTB samples and three subtypes of hormone receptor-related  
586 breast cancer samples. Although several DEGs were found in both PTB and cancer  
587 subtypes, their expression patterns are not consistent. It perhaps is because of different  
588 subtype of samples derived from heterogeneous populations, as well as different  
589 phenotypes involved in the analyses. Nevertheless, our data provides additional  
590 evidence that PTB might be related with breast cancer hormone-related subtypes. A  
591 graphic overview of our results is summarized in Fig. 6c. We proposed interplays of  
592 gestational age with PTB, fetal disease and breast cancer. The representative PTB genes  
593 *CRHBP*, *ICAM1*, *THBS4*, *DNMT1*, *CNTLN*, *PLAGL1*, *DKK1* and *EGR2* are likely  
594 associated with these phenotypes by targeting immune and inflammatory response,  
595 coagulation, and cell adhesion.

## 596 **Conclusions**

597 This study benchmarked the ability of ulcWGS to be used for genotype imputation. As  
598 the first study using a large cohort of human embryo samples with ulcWGS, we  
599 demonstrate its power and effectiveness in GWAS. We detected 40 significant SNPs  
600 and 11 genomic risk loci that contains independent significant SNPs and are associated  
601 with gestational age. From 166 genes mapped to the risk loci. We establish  
602 interrelationships between the mapped genes and maternal or infant diseases and  
603 provide insights into understanding the genetic associations of gestational ages. Our  
604 findings should expand current GWAS related to gestational duration and preterm trait

605 by including Chinese and East Asian samples and would therefore be helpful to future  
606 research.

607

## 608 **Supplementary Information**

609

610 **Additional file 1: Table S1.** Genotype imputation performance at different ultra-low  
611 coverages and sample sizes. **Table S2.** WGA methods and sequencing platforms used  
612 in the PGT experiments. **Table S3.** The summary of 40 significant SNPs satisfying  
613 Bonferroni-corrected significant levels of  $4.526e-8$  from 1,744 embryo PGT samples.  
614 **Table S4.** The list of candidate SNPs. **Table S5.** Nonsynonymous SNPs that are  
615 independent significant SNPs or in LD ( $r^2 > 0.6$ ) with one of the independent significant  
616 SNPs. **Table S6.** The reported genomic risk loci from GWAS catalog that were detected  
617 in our dataset. **Table S7.** A list of 166 mapped genes by positional, eQTL, and chromatin  
618 interaction mappings. **Table S8.** Data sources of genome-wide mRNA expression in  
619 Preterm birth, infant disease and breast cancer. **Table S9.** A list of the 166 mapped genes  
620 that were also identified by differentially expressed genes (DEGs) derived from  
621 analyzing the genome-wide gene expression datasets listed.

## 622 **Additional file 2: Supplemental Methods**

623 **Additional file 3: Figure S1.** Sequencing coverage statistics of the 17,844 embryos.  
624 **Figure S2.** Visualizing the linear regression model for genotype accuracy prediction.  
625 **Figure S3.** Quality control of SNP calling. **Figure S4.** Figure S4. Principal component  
626 analysis of all 17,844 embryo samples. **Figure S5.** Distribution of gestational age in the

627 1,744 born embryo samples. **Figure S6.** Quantile-Quantile plot of the 1,107,198 studied  
628 SNPs. **Figure S7.** Pie charts of the candidate SNPs. **Figure S8.** Zoom in locus plots of  
629 the 11 genomic risk loci. **Figure S9.** Circos plots of chromatin interactions and eQTL  
630 mapping. **Figure S10.** Gene set analysis of the 166 mapped genes. **Figure 11.** Co-  
631 expression network of PTB-related genes in maternal and infant subtypes.

632

### 633 **Abbreviations**

634 WGS: whole genome sequencing; NGS: next-generation sequencing; GWAS:  
635 genome-wide association study; bp: base pair; SNP: single nucleotide polymorphism;  
636 PTB: preterm birth; PGT: preimplantation genetic testing; MAF: minor allele  
637 frequency; LD: linkage disequilibrium; HWE: Hardy-Weinberg equilibrium; WGA:  
638 whole genome amplification; PCA: principal component analysis; eQTL: expression  
639 quantitative trait locus; FDR: false discovery rate; GO: gene ontology; BPD:  
640 bronchopulmonary dysplasia; ER: Estrogen receptor; PR: Progesterone receptor;  
641 HER2: human epidermal growth factor receptor 2; TNBC: Triple-negative breast  
642 cancer; DEG: differentially expressed gene; AF: allele frequency. GIAB: Genome in a  
643 Bottle; BWA: Burrows-Wheeler Aligner. GEO: Gene Expression Omnibus; NCBI:  
644 National Center for Biotechnology Information.

645

### 646 **Declarations**

#### 647 **Ethics approval and consent to participate**

648 All individual samples in the technical concordance cohort and clinical cohort, and  
649 protocols used in this study have been reviewed and approved by the Institutional

650 Review Board (IRB) of China International Trust Investment Corporation - Xianngya  
651 (IRB Reference No. LL-SC-2020-004). The need to obtain informed consent has been  
652 waived by the IRB due to the study's retrospective nature. Following the regulations of  
653 the Human Genetic Resources Administration of China, all genetic materials involved  
654 in this study have been reviewed and approved by Ministry of Science and Technology  
655 of the People's Republic of China (Approval No. [2022] GH1831). The experimental  
656 methods were in accordance with the principles of the Helsinki Declaration.

657

#### 658 **Consent for publication**

659 Not applicable

660

#### 661 **Availability of data and materials**

662 The datasets supporting the conclusions of this article are included within the article  
663 and its additional files. The significant SNPs and candidate SNPs are listed in  
664 Additional file 1: Tables S3 and S4, respectively. The processed or raw counts of mRNA  
665 expression datasets shown in Additional file 1: Table S8 was downloaded from Gene  
666 Expression Omnibus (GEO)/National Center for Biotechnology Information (NCBI).

667

#### 668 **Funding**

669 The study was supported by the Early Career Schema (27204518) of the Hong Kong  
670 Research Grants Council for RL, partially by General Research Funding of Hong Kong  
671 Research Grants Council (17113721) for RL and (17117918) for BY, by the University

672 Grants Committees Fund from the University of Hong Kong for RL, partially by  
673 National Key Research and Developmental Program of China (2018YFC1004900) for  
674 YT, by the Innovation and Technology Fund (ITF/331/17FP) of Innovation and  
675 Technology Commission of the Hong Kong SAR government for TL.

676

### 677 **Competing interests**

678 The authors declare that they have no competing interests.

679

### 680 **Authors' contributions**

681 SL, RL and BY developed the computational pipeline and the algorithms. RL, GL, YW,  
682 TKL, and TL designed the experiments. PX, YG, FG and YT contributed to the clinical  
683 data collection. SL, BY, JL, YG and FG performed data processing and analysis. RL,  
684 GL, SL, BY, PX and YW participated in drafting the manuscript. All authors read and  
685 approved the final manuscript.

686

### 687 **Acknowledgements**

688 Not applicable

689

690

691

692

## 693 Reference

- 694 1. Visscher PM, Wray NR, Zhang Q, Sklar P, McCarthy MI, Brown MA, et al. 10  
695 Years of GWAS Discovery: Biology, Function, and Translation. *American journal of*  
696 *human genetics*. 2017;101(1):5-22.
- 697 2. Pasaniuc B, Rohland N, McLaren PJ, Garimella K, Zaitlen N, Li H, et al. Extremely  
698 low-coverage sequencing and imputation increases power for genome-wide association  
699 studies. 2012;44(6):631.
- 700 3. Wang Z, Chatterjee N. Increasing mapping precision of genome-wide association  
701 studies: to genotype and impute, sequence, or both? *Genome Biology*. 2017;18(1):118.
- 702 4. Quick C, Anugu P, Musani S, Weiss ST, Burchard EG, White MJ, et al. Sequencing  
703 and imputation in GWAS: Cost-effective strategies to increase power and genomic  
704 coverage across diverse populations. 2020;44(6):537-49.
- 705 5. Gilly A, Southam L, Suveges D, Kuchenbaecker K, Moore R, Melloni GEM, et al.  
706 Very low-depth whole-genome sequencing in complex trait association studies.  
707 *Bioinformatics*. 2019;35(15):2555-61.
- 708 6. Homburger JR, Neben CL, Mishne G, Zhou AY, Kathiresan S, Khera AV. Low  
709 coverage whole genome sequencing enables accurate assessment of common variants  
710 and calculation of genome-wide polygenic scores. *Genome medicine*. 2019;11(1):74.
- 711 7. Marchini J, Howie B. Genotype imputation for genome-wide association studies.  
712 *Nature reviews Genetics*. 2010;11(7):499-511.
- 713 8. Liu S, Huang S, Chen F, Zhao L, Yuan Y, Francis SS, et al. Genomic Analyses from  
714 Non-invasive Prenatal Testing Reveal Genetic Associations, Patterns of Viral Infections,  
715 and Chinese Population History. *Cell*. 2018;175(2):347-59.e14.
- 716 9. Cronin FM, Segurado R, McAuliffe FM, Kelleher CC, Tremblay RE. Gestational  
717 Age at Birth and 'Body-Mind' Health at 5 Years of Age: A Population Based Cohort  
718 Study. *PloS one*. 2016;11(3):e0151222.
- 719 10. Knijnenburg TA, Vockley JG, Chambwe N, Gibbs DL, Humphries C, Huddleston  
720 KC, et al. Genomic and molecular characterization of preterm birth. *Proceedings of the*  
721 *National Academy of Sciences of the United States of America*. 2019;116(12):5819-27.
- 722 11. Liu X, Helenius D, Skotte L, Beaumont RN, Wielscher M, Geller F, et al. Variants  
723 in the fetal genome near pro-inflammatory cytokine genes on 2q13 associate with  
724 gestational duration. *Nature communications*. 2019;10(1):3927.
- 725 12. Zhang G, Feenstra B, Bacelis J, Liu X, Muglia LM, Juodakis J, et al. Genetic  
726 Associations with Gestational Duration and Spontaneous Preterm Birth. *The New*  
727 *England journal of medicine*. 2017;377(12):1156-67.
- 728 13. Wadon M, Modi N, Wong HS, Thapar A, O'Donovan MC. Recent advances in the  
729 genetics of preterm birth. *Annals of human genetics*. 2019.
- 730 14. Brezina PR, Kutteh WH, Bailey AP, Ke RW. Preimplantation genetic screening  
731 (PGS) is an excellent tool, but not perfect: a guide to counseling patients considering  
732 PGS. *Fertil Steril*. 2016;105(1):49-50.
- 733 15. Huang L, Bogale B, Tang Y, Lu S, Xie XS, Racowsky C. Noninvasive  
734 preimplantation genetic testing for aneuploidy in spent medium may be more reliable

- 735 than trophectoderm biopsy. *Proc Natl Acad Sci U S A*. 2019;116(28):14105-12.
- 736 16. Tan Y, Yin X, Zhang S, Jiang H, Tan K, Li J, et al. Clinical outcome of  
737 preimplantation genetic diagnosis and screening using next generation sequencing.  
738 *GigaScience*. 2014;3(1):30.
- 739 17. Zook JM, Chapman B, Wang J, Mittelman D, Hofmann O, Hide W, et al.  
740 Integrating human sequence data sets provides a resource of benchmark SNP and indel  
741 genotype calls. *Nature Biotechnology*. 2014;32(3):246-51.
- 742 18. Quinlan AR. BEDTools: The Swiss-Army Tool for Genome Feature Analysis.  
743 *Current protocols in bioinformatics*. 2014;47:11.2.1-34.
- 744 19. Li H, Durbin R. Fast and accurate short read alignment with Burrows–Wheeler  
745 transform. *Bioinformatics*. 2009;25(14):1754-60.
- 746 20. Li H, Handsaker B, Wysoker A, Fennell T, Ruan J, Homer N, et al. The Sequence  
747 Alignment/Map format and SAMtools. *Bioinformatics*. 2009;25(16):2078-9.
- 748 21. Li H. FermiKit: assembly-based variant calling for Illumina resequencing data.  
749 *Bioinformatics*. 2015;31(22):3694-6.
- 750 22. Kent WJ, Sugnet CW, Furey TS, Roskin KM, Pringle TH, Zahler AM, et al. The  
751 human genome browser at UCSC. *Genome Res*. 2002;12(6):996-1006.
- 752 23. Kent WJ, Zweig AS, Barber G, Hinrichs AS, Karolchik D. BigWig and BigBed:  
753 enabling browsing of large distributed datasets. *Bioinformatics*. 2010;26(17):2204-7.
- 754 24. Davies RW, Flint J, Myers S, Mott R. Rapid genotype imputation from sequence  
755 without reference panels. *Nature genetics*. 2016;48(8):965-9.
- 756 25. Skotte L, Korneliussen TS, Albrechtsen A. Association testing for next-generation  
757 sequencing data using score statistics. *Genet Epidemiol*. 2012;36(5):430-7.
- 758 26. Korneliussen TS, Albrechtsen A, Nielsen R. ANGSD: Analysis of Next Generation  
759 Sequencing Data. *BMC Bioinformatics*. 2014;15:356.
- 760 27. Watanabe K, Taskesen E, van Bochoven A, Posthuma D. Functional mapping and  
761 annotation of genetic associations with FUMA. *Nature communications*.  
762 2017;8(1):1826.
- 763 28. Auton A, Brooks LD, Durbin RM, Garrison EP, Kang HM, Korbel JO, et al. A  
764 global reference for human genetic variation. *Nature*. 2015;526(7571):68-74.
- 765 29. Wang K, Li M, Hakonarson H. ANNOVAR: functional annotation of genetic  
766 variants from high-throughput sequencing data. *Nucleic Acids Res*. 2010;38(16):e164.
- 767 30. Sherman BT, Hao M, Qiu J, Jiao X, Baseler MW, Lane HC, et al. DAVID: a web  
768 server for functional enrichment analysis and functional annotation of gene lists  
769 (2021 update). *Nucleic Acids Res*. 2022.
- 770 31. The Genotype-Tissue Expression (GTEx) project. *Nat Genet*. 2013;45(6):580-5.
- 771 32. Schmitt AD, Hu M, Jung I, Xu Z, Qiu Y, Tan CL, et al. A Compendium of  
772 Chromatin Contact Maps Reveals Spatially Active Regions in the Human Genome. *Cell*  
773 *reports*. 2016;17(8):2042-59.
- 774 33. Giusti-Rodriguez PM, Sullivan PF. Using three-dimensional regulatory chromatin  
775 interactions from adult and fetal cortex to interpret genetic results for psychiatric  
776 disorders and cognitive traits. 2019:406330.
- 777 34. Akbarian S, Liu C, Knowles JA, Vaccarino FM, Farnham PJ, Crawford GE, et al.  
778 The PsychENCODE project. *Nature neuroscience*. 2015;18(12):1707-12.



- 779 35. Noguchi S, Arakawa T, Fukuda S, Furuno M, Hasegawa A, Hori F, et al.  
780 FANTOM5 CAGE profiles of human and mouse samples. *Scientific data*.  
781 2017;4:170112.
- 782 36. Howie BN, Donnelly P, Marchini J. A flexible and accurate genotype imputation  
783 method for the next generation of genome-wide association studies. *PLoS Genet*.  
784 2009;5(6):e1000529.
- 785 37. Sherry ST, Ward MH, Kholodov M, Baker J, Phan L, Smigielski EM, et al. dbSNP:  
786 the NCBI database of genetic variation. *Nucleic Acids Res*. 2001;29(1):308-11.
- 787 38. Karczewski KJ, Francioli LC, Tiao G, Cummings BB, Alföldi J, Wang Q, et al. The  
788 mutational constraint spectrum quantified from variation in 141,456 humans. *Nature*.  
789 2020;581(7809):434-43.
- 790 39. Skol AD, Scott LJ, Abecasis GR, Boehnke M. Joint analysis is more efficient than  
791 replication-based analysis for two-stage genome-wide association studies. *Nat Genet*.  
792 2006;38(2):209-13.
- 793 40. Bulik-Sullivan BK, Loh PR, Finucane HK, Ripke S, Yang J, Patterson N, et al. LD  
794 Score regression distinguishes confounding from polygenicity in genome-wide  
795 association studies. *Nat Genet*. 2015;47(3):291-5.
- 796 41. Maurano MT, Humbert R, Rynes E, Thurman RE, Haugen E, Wang H, et al.  
797 Systematic localization of common disease-associated variation in regulatory DNA.  
798 *Science*. 2012;337(6099):1190-5.
- 799 42. Pasaniuc B, Rohland N, McLaren PJ, Garimella K, Zaitlen N, Li H, et al. Extremely  
800 low-coverage sequencing and imputation increases power for genome-wide association  
801 studies. *Nature Genetics*. 2012;44:631.
- 802 43. Wulf G, Ryo A, Liou Y-C, Lu KP. The prolyl isomerase Pin1 in breast development  
803 and cancer. *Breast Cancer Res*. 2003;5(2):76-82.
- 804 44. Consortium GT. The GTEx Consortium atlas of genetic regulatory effects across  
805 human tissues. *Science (New York, NY)*. 2020;369(6509):1318-30.
- 806 45. Vora B, Wang A, Kostı I, Huang H, Paranjpe I, Woodruff TJ, et al. Meta-Analysis  
807 of Maternal and Fetal Transcriptomic Data Elucidates the Role of Adaptive and Innate  
808 Immunity in Preterm Birth. *Front Immunol*. 2018;9:993-.
- 809 46. Strauss JF, 3rd, Romero R, Gomez-Lopez N, Haymond-Thornburg H, Modi BP,  
810 Teves ME, et al. Spontaneous preterm birth: advances toward the discovery of genetic  
811 predisposition. *American journal of obstetrics and gynecology*. 2018;218(3):294-  
812 314.e2.
- 813 47. Velez DR, Fortunato SJ, Thorsen P, Lombardi SJ, Williams SM, Menon R. Preterm  
814 birth in Caucasians is associated with coagulation and inflammation pathway gene  
815 variants. *PloS one*. 2008;3(9):e3283-e.
- 816 48. Sheikh IA, Ahmad E, Jamal MS, Rehan M, Assidi M, Tayubi IA, et al. Spontaneous  
817 preterm birth and single nucleotide gene polymorphisms: a recent update. *BMC*  
818 *Genomics*. 2016;17(Suppl 9):759.
- 819 49. Uzun A, Sharma S, Padbury J. A bioinformatics approach to preterm birth.  
820 *American journal of reproductive immunology (New York, NY : 1989)*.  
821 2012;67(4):273-7.
- 822 50. Siffel C, Kistler KD, Lewis JFM, Sarda SP. Global incidence of bronchopulmonary

- 823 dysplasia among extremely preterm infants: a systematic literature review. *The journal*  
824 *of maternal-fetal & neonatal medicine : the official journal of the European Association*  
825 *of Perinatal Medicine, the Federation of Asia and Oceania Perinatal Societies, the*  
826 *International Society of Perinatal Obstet.* 2019;1-11.
- 827 51. Cai Y, Ma F, Qu L, Liu B, Xiong H, Ma Y, et al. Weighted Gene Co-expression  
828 Network Analysis of Key Biomarkers Associated With Bronchopulmonary Dysplasia.  
829 *Front Genet.* 2020;11:539292.
- 830 52. Villamor-Martinez E, Lubach GA, Rahim OM, Degraeuwe P, Zimmermann LJ,  
831 Kramer BW, et al. Association of Histological and Clinical Chorioamnionitis With  
832 Neonatal Sepsis Among Preterm Infants: A Systematic Review, Meta-Analysis, and  
833 Meta-Regression. *Front Immunol.* 2020;11:972.
- 834 53. Rosette C, Roth RB, Oeth P, Braun A, Kammerer S, Ekblom J, et al. Role of  
835 ICAM1 in invasion of human breast cancer cells. *Carcinogenesis.* 2005;26(5):943-50.
- 836 54. Schroder C, Witzel I, Muller V, Krenkel S, Wirtz RM, Janicke F, et al. Prognostic  
837 value of intercellular adhesion molecule (ICAM)-1 expression in breast cancer. *J*  
838 *Cancer Res Clin Oncol.* 2011;137(8):1193-201.
- 839 55. Xu WH, Liu ZB, Yang C, Qin W, Shao ZM. Expression of dickkopf-1 and beta-  
840 catenin related to the prognosis of breast cancer patients with triple negative phenotype.  
841 *PloS one.* 2012;7(5):e37624.
- 842 56. Shin E, Lee Y, Koo JS. Differential expression of the epigenetic methylation-  
843 related protein DNMT1 by breast cancer molecular subtype and stromal histology. *J*  
844 *Transl Med.* 2016;14:87.
- 845 57. Wong KK. DNMT1: A key drug target in triple-negative breast cancer. *Semin*  
846 *Cancer Biol.* 2020.
- 847 58. Robertson SA, Hutchinson MR, Rice KC, Chin PY, Moldenhauer LM, Stark MJ,  
848 et al. Targeting Toll-like receptor-4 to tackle preterm birth and fetal inflammatory injury.  
849 *Clin Transl Immunology.* 2020;9(4):e1121.
- 850 59. Zhang G, Srivastava A, Bacelis J, Juodakis J, Jacobsson B, Muglia LJ. Genetic  
851 studies of gestational duration and preterm birth. *Best Pract Res Clin Obstet Gynaecol.*  
852 2018;52:33-47.
- 853 60. Petraglia F, Imperatore A, Challis JR. Neuroendocrine mechanisms in pregnancy  
854 and parturition. *Endocr Rev.* 2010;31(6):783-816.
- 855 61. Majzoub JA, McGregor JA, Lockwood CJ, Smith R, Taggart MS, Schulkin J. A  
856 central theory of preterm and term labor: putative role for corticotropin-releasing  
857 hormone. *American journal of obstetrics and gynecology.* 1999;180(1 Pt 3):S232-41.
- 858 62. Díaz-Pérez FI, Hiden U, Gauster M, Lang I, Konya V, Heinemann A, et al. Post-  
859 transcriptional down regulation of ICAM-1 in feto-placental endothelium in GDM. *Cell*  
860 *adhesion & migration.* 2016;10(1-2):18-27.
- 861 63. Chen X, Scholl TO. Maternal biomarkers of endothelial dysfunction and preterm  
862 delivery. *PloS one.* 2014;9(1):e85716.
- 863 64. Labarrere CA, Bammerlin E, Hardin JW, Dicarlo HL. Intercellular adhesion  
864 molecule-1 expression in massive chronic intervillitis: implications for the invasion  
865 of maternal cells into fetal tissues. *Placenta.* 2014;35(5):311-7.
- 866 65. Kim SC, Lee JE, Kang SS, Yang HS, Kim SS, An BS. The regulation of oxytocin

867 and oxytocin receptor in human placenta according to gestational age. Journal of  
868 molecular endocrinology. 2017;59(3):235-43.

869 66. Keyser EA, Staat BC, Fausett MB, Shields AD. Pregnancy-associated breast cancer.  
870 Rev Obstet Gynecol. 2012;5(2):94-9.

871 67. Froehlich K, Schmidt A, Heger JI, Al-Kawlani B, Aberl CA, Jeschke U, et al.  
872 Breast cancer, placenta and pregnancy. Eur J Cancer. 2019;115:68-78.

873

874

875

876

877

878

879

880

881

882

883

884

885

886

887

888

889

890

891

892

893

894

895

896

897

898

899

900

901

902

903

904

905

906 **Figures**

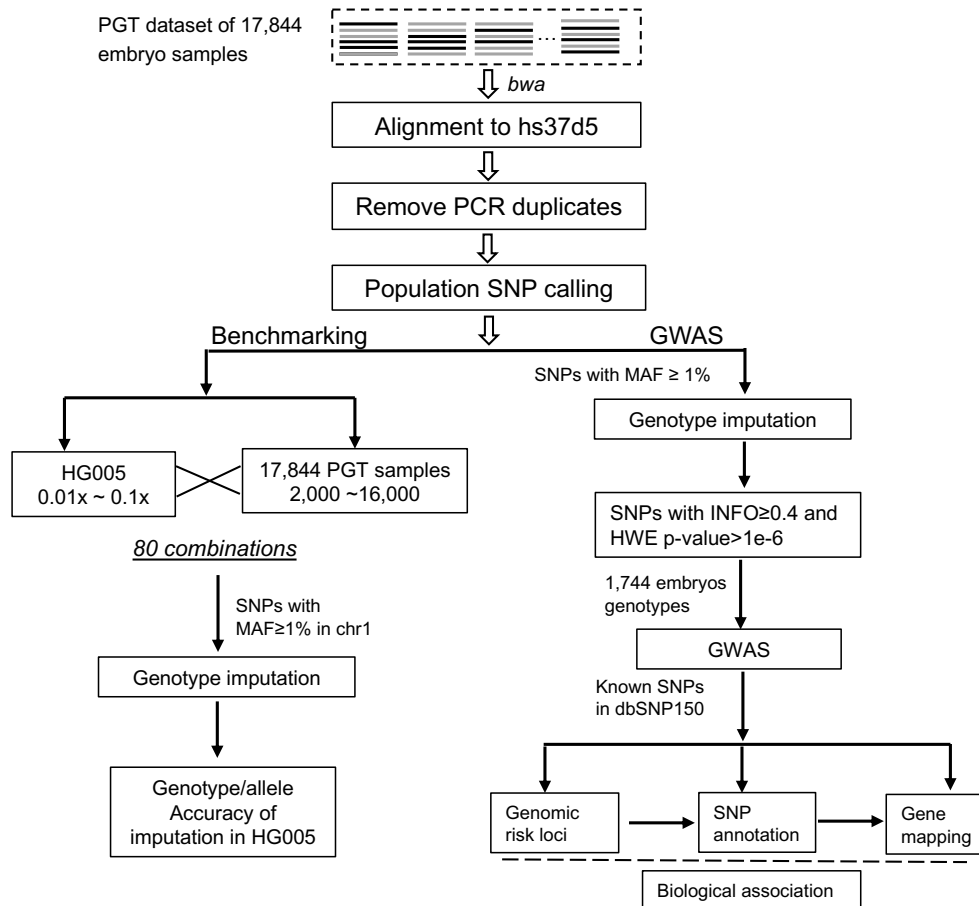

907

908 **Fig. 1. An overview of the analysis and benchmarking pipeline for ultra-low**  
 909 **coverage WGS.**

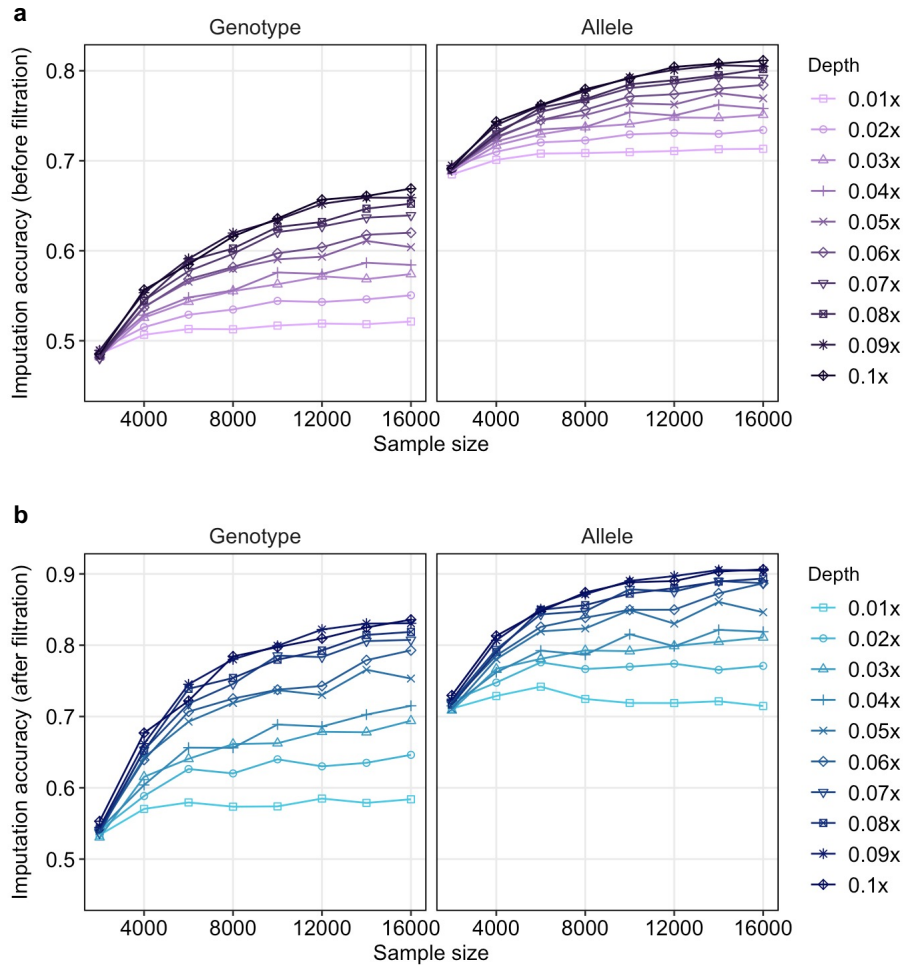

910  
 911  
 912  
 913  
 914  
 915  
 916

**Fig. 2. Imputation accuracy at different coverages and sample sizes.** The accuracies of imputed genotype (a) or allele (b) were obtained by comparing with the known genotypes in HG005. After using filter “INFO score  $\geq 0.4$  and HWE  $p$ -value  $> 1e-6$ ”, the accuracies of imputed genotype (c) or allele (d).

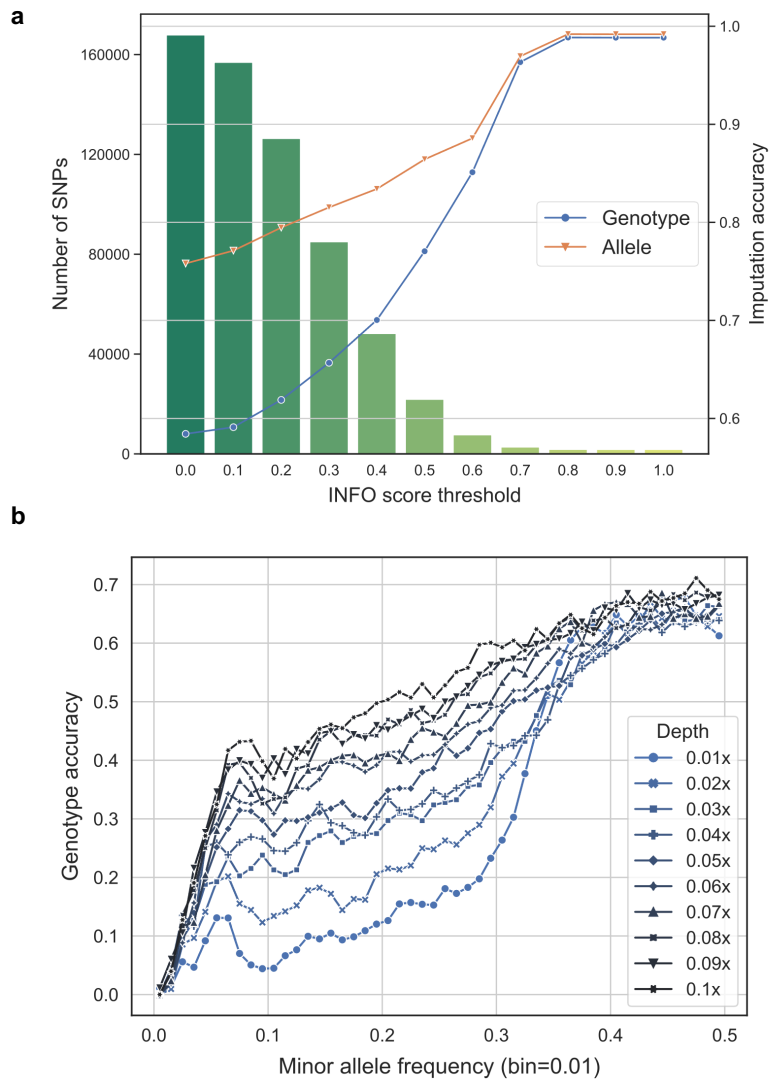

917

918

919 **Fig. 3. Performance of different imputation result filters.** The accuracies of our  
 920 samples were calculated against the known genotypes in HG005. a, effect of INFO  
 921 score filtering cutoffs on genotype and allele accuracies. The imputation was conducted  
 922 by using 0.04x sequencing coverage of HG005 and with 16000 embryo samples. b,  
 923 effect of MAF cutoffs on genotype accuracy at multiple sequencing coverages. The  
 924 imputation was conducted through different sequencing coverages of HG005 with  
 925 16000 embryo samples.

926

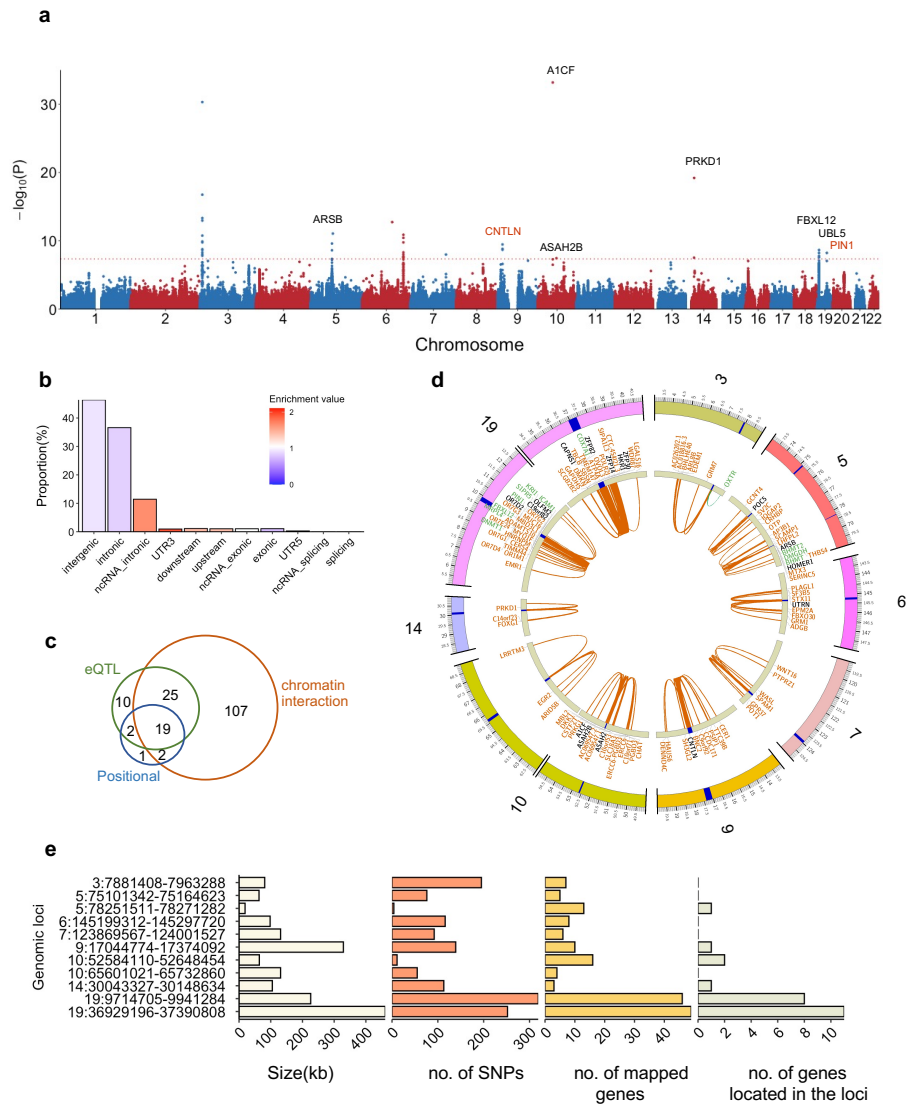

927

928

929

**Fig. 4. SNP-based genome-wide association on gestational age.** a, Manhattan plot of

930

the SNPs in GWAS. The red dash line represents the genome-wide significance level

931

4.515e-8. The SNP “rs946934582” with p value of 2.764e-144 is beyond the scale, thus

932

hereby listed alone. The genes shown are linking with the candidate SNPs and position

933

of the corresponding genomic risk loci. b, functional annotation and enrichment test

934

result of the candidate SNPs in FUMA. c, a Venn diagram of the 166 genes that could

935

be mapped to the 11 genomic risk loci by positional, eQTL and chromatin interaction

936

strategies. d, a Circos plot of the chromatin interactions and eQTL mapping in the 11

937

genomic risk loci from eight chromosomes. The outer ring is chromosomes, the regions

938

in blue denote genomic risk loci. The middle ring represents the mapped genes. The

939

color of the gene symbols shows how they were mapped, eQTL in green, chromatin

940

interaction in orange, and both eQTL and chromatin interaction in black. The inner ring

941

shows the linking edges, eQTL in green, and chromatin interaction in orange. e, a

942

summary of the 11 genomic risk loci.

943

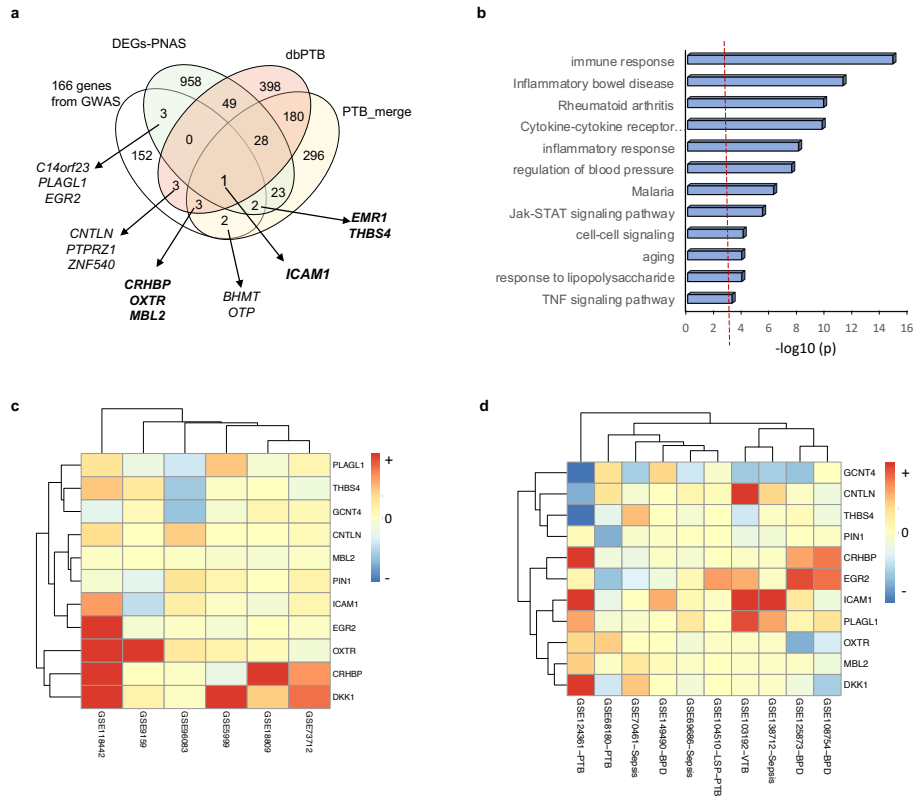

944

945 **Fig. 5. Comparison of the 166 genes mapped to 11 genomic risk loci with PTB and**  
 946 **infant disease.** a, the 166 mapped genes were compared with 3 sets of reported PTB  
 947 genes including dbPTB from Sheikh et al. (48) and Uzun et al. (49), PTB-merged from  
 948 5 resources (10), and PNAS-identified DEGs in 2019 (10) (see Additional file 1: Table  
 949 S8). b, a bar graph showing significantly enriched GO biological processes and KEGG  
 950 pathways based on the 50 PTB marker genes (see Additional file 1: Table S7). c-d,  
 951 heatmaps showing expression profiling and clusters of the PTB genes predicted from  
 952 GWAS under maternal PTB (c) and PTB infant with BPD and sepsis (d). The gene  
 953 expression data was extracted from the listed GSE accession numbers of NCBI/GEO.



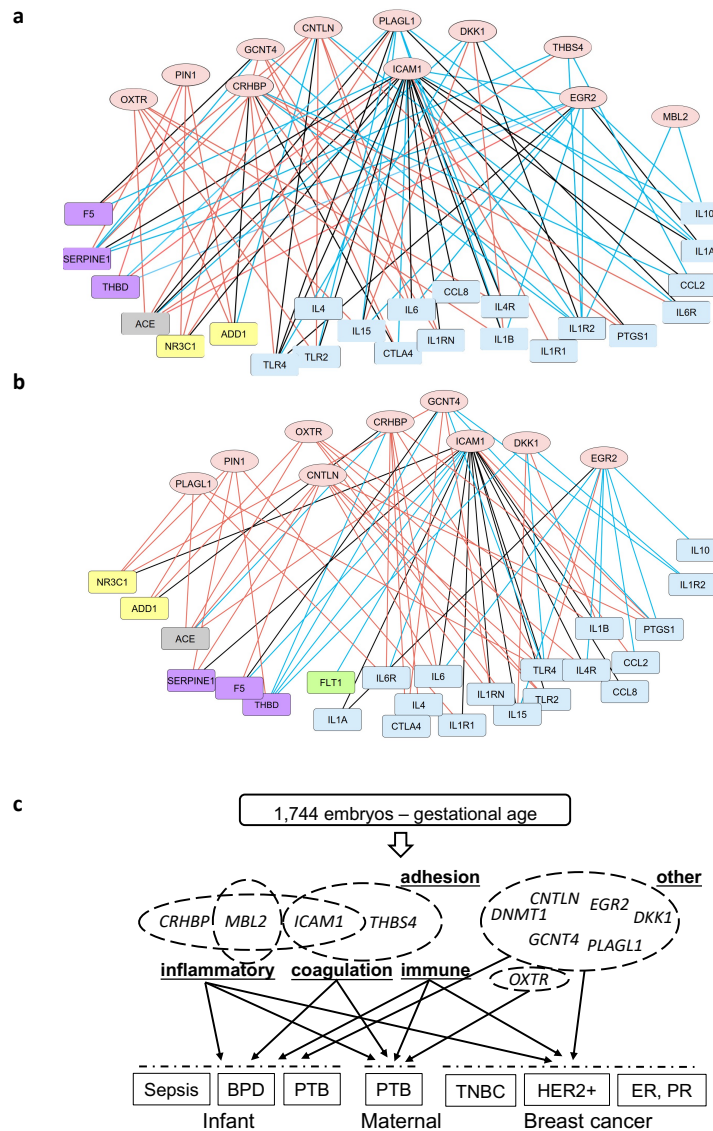

954

955

956 **Fig. 6. Associated analysis of the PTB-related genes in maternal and infant**

957 **subtypes.** a, a gene co-expression network merging maternal and infant PTB subtypes.

958 b, a gene co-expression network merging maternal PTB and BPD of preterm infant. In

959 A and B, oval nodes represent PTB related genes predicted from GWAS using the 1,744

960 born embryo samples, rectangle nodes refer to the 50 top PTB markers summarized

961 from previously studies (Additional file 1: Table S7), involving immune or

962 inflammation (blue), apoptosis (yellow), angiogenesis (green), coagulation (purple) and

963 other biological processes (grey). Co-expressive edges (Pearson correlation p value <

964 0.01) linking nodes represent maternal (red), infant (blue) and both maternal and infant

965 (black). c, a graphic summary to illustrate gestational age's association with PTB, infant

966 disease and breast cancer.

967

968

969 **Table 1. Genotype imputation performance with different filtering criteria**

970

| Filtering criteria                                | SNP number | Genotype accuracy | Allele accuracy |
|---------------------------------------------------|------------|-------------------|-----------------|
| None                                              | 167814     | 0.584             | 0.758           |
| Known SNP in 1000G reference panel                | 141161     | 0.578             | 0.751           |
| INFO score $\geq 0.1$                             | 156835     | 0.591             | 0.771           |
| INFO score $\geq 0.2$                             | 126331     | 0.618             | 0.794           |
| INFO score $\geq 0.3$                             | 84932      | 0.656             | 0.815           |
| INFO score $\geq 0.4$                             | 48176      | 0.7               | 0.834           |
| MAF $\geq 0.05$                                   | 162788     | 0.597             | 0.777           |
| HWE $p$ -value $> 1e-9$                           | 84237      | 0.595             | 0.695           |
| HWE $p$ -value $> 1e-6$                           | 77419      | 0.596             | 0.692           |
| HWE $p$ -value $> 1e-3$                           | 65561      | 0.599             | 0.687           |
| HWE $p$ -value $> 1e-6$ and INFO score $\geq 0.1$ | 68505      | 0.610             | 0.713           |
| HWE $p$ -value $> 1e-6$ and INFO score $\geq 0.2$ | 55972      | 0.646             | 0.751           |
| HWE $p$ -value $> 1e-6$ and INFO score $\geq 0.3$ | 42202      | 0.681             | 0.786           |
| HWE $p$ -value $> 1e-6$ and INFO score $\geq 0.4$ | 28773      | 0.715             | 0.818           |

971 Totally 16,000 samples with an average of 0.04x sequencing coverage were used for imputation.

972

973 **Table 2. Main mapped genes differentially expressed in PTB, infant disease and**  
 974 **breast cancer**

975

| Genes mapped to risk loci | Overlapped No. with the reported PTB datasets | No. of DEGs detected in gene expression data |               |            |               |                      |                    |                     |
|---------------------------|-----------------------------------------------|----------------------------------------------|---------------|------------|---------------|----------------------|--------------------|---------------------|
|                           |                                               | Maternal PTB                                 | Infant PTB    | Infant BPD | Infant sepsis | Breast cancer ER, PR | Breast cancer TNBC | Breast cancer HER2+ |
| <i>ICAM1</i>              | 6                                             | 1(up)                                        | 2(up)         | 1(up)      | 1(up)         | 1(up),2(down)        | 2(up)              | 1(up)               |
| <i>CRHBP</i>              | 5                                             | 2(up)                                        | 1(up)         | 1(up)      |               |                      |                    |                     |
| <i>OXR</i>                | 5                                             | 2(up)                                        |               |            |               | 1(up)                | 1(down)            |                     |
| <i>THBS4</i>              | 3                                             | 1(down)                                      | 1(down)       |            | 1(up)         | 1(up)                | 2(down)            | 1(up),1(down)       |
| <i>EGR2</i>               | 2                                             | 1(up)                                        | 1(up)         | 1(up)      |               | 1(up)                | 2(down)            | 2(down)             |
| <i>CNTLN</i>              | 1                                             | 1(up)                                        | 1(up),1(down) |            | 1(up)         | 1(down)              |                    | 1(down)             |
| <i>MBL2</i>               | 4                                             |                                              | 1(up)         |            |               |                      |                    |                     |
| <i>EMR1</i>               | 2                                             |                                              |               | 1(up)      |               |                      |                    |                     |
| <i>PLAGL1</i>             | 1                                             | 1(up)                                        | 2(up)         |            | 1(up)         | 2(down)              | 2(down)            | 2(down)             |
| <i>DKK1</i>               |                                               | 2(up)                                        | 1(up)         | 1(down)    |               | 2(down)              | 3(up),1(down)      | 1(up),1(down)       |
| <i>GCNT4</i>              |                                               | 1(down)                                      | 2(down)       | 1(down)    | 2(down)       | 1(up),2(down)        | 1(down)            | 1(down)             |
| <i>DNMT1</i>              |                                               | 1(up)                                        | 1(up)         |            |               |                      | 1(up)              | 1(up)               |
| <i>PIN1</i>               |                                               | 1(down)                                      | 1(down)       |            |               |                      |                    |                     |

976 PTB related genes identified in our GWAS were compared with DEGs identified in published gene  
 977 expression datasets (Additional file 1: Table S9). “up” and “down” indicate differentially overexpressed  
 978 and underexpressed gene, respectively.
